# Supplementary material for: WNT/β-catenin pathway activation via Wnt1 overexpression and Axin1 downregulation correlates with cadherin-catenin complex disruption and increased lymph node involvement in micropapillary-predominant lung adenocarcinoma
Source: PubMed Central journal article supplement — J Thorac Dis. 2020 Oct;12(10):5906–15. doi: 10.21037/jtd-20-1495 (PMC7656375; doi:10.21037/jtd-20-1495), 2020-10
Supplement: jtd-12-10-5906-dss.pdf [file jtd-12-10-5906-dss.pdf]

## Data Sharing Statement

|                     |                                                                                                                                                    |                                                                                                                  |
|---------------------|----------------------------------------------------------------------------------------------------------------------------------------------------|------------------------------------------------------------------------------------------------------------------|
| <b>Article Info</b> | http://dx.doi.org/10.21037/jtd-20-1495.                                                                                                            |                                                                                                                  |
| <b>Item</b>         | <b>Question</b>                                                                                                                                    | <b>Authors' Response</b><br>(place "-" if not applicable)                                                        |
| 1                   | Would you like to share data collected for your study to others?                                                                                   | Yes                                                                                                              |
| 2                   | If not, would you like to share the reason for your decision?                                                                                      | -                                                                                                                |
| 3                   | What data in particular will be shared?                                                                                                            | The IHC pictures presented in the article will be shared.                                                        |
| 4                   | Any other documents will be share? Such as study protocol, statistical analysis plan, informed consent form, clinical study report, analytic code. | Method materials used in this article will be shared.                                                            |
| 5                   | When will data availability begin?                                                                                                                 | From the publication date.                                                                                       |
| 6                   | When will data availability end?                                                                                                                   | Two years within the publication date, since the technique or survival date may be updated over time.            |
| 7                   | To whom will you share the data?                                                                                                                   | Pathologists and lab researchers.                                                                                |
| 8                   | For what type of analysis or purpose?                                                                                                              | Protein expression and biological behavior of lung cancer.                                                       |
| 9                   | How or where can the data/documents be obtained?                                                                                                   | Emails could be sent to the address below to obtain the shared data:<br>zhuliang@zjcc.org.cn                     |
| 10                  | Any other restrictions?                                                                                                                            | We may balance the potential benefits and risks for each request and then provide the data that could be shared. |
